# Supplementary material for: Anoctamin 4 channel currents activate glucose-inhibited neurons in the mouse ventromedial hypothalamus during hypoglycemia
Source: PubMed Central journal article supplement (PMC10348766; doi:10.1172/jci163391), 2023-07-17

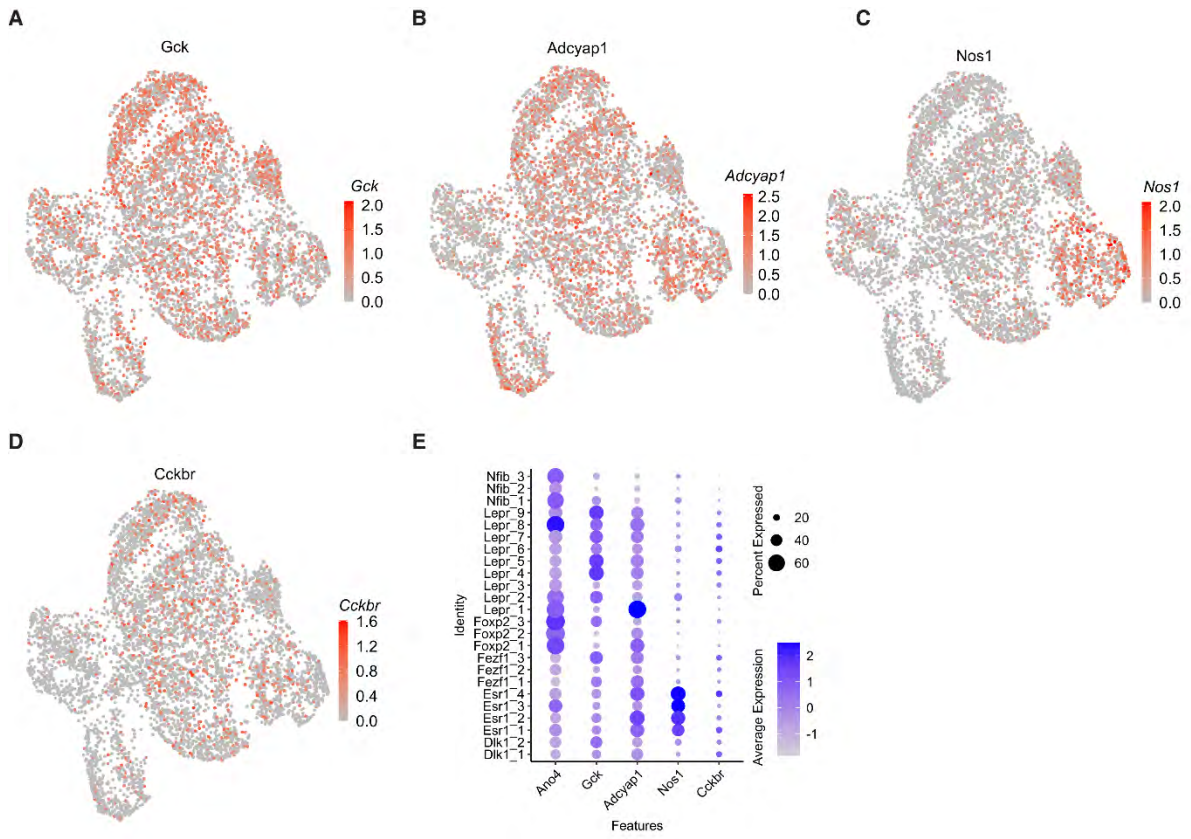

898

899 **Supplementary Figure 1. Distribution of putative markers of GI neurons in the VMH.**  
900 **A-I.** Gck, Adcyap1, Nos1 and Cckbr expression in VMH neurons mapped in same UMAP space.  
901 **J.** Dotplot of VMH neuron clusters for target genes. Size of dot indicating the percent of neurons  
902 in that cluster that express the target gene. Color of dot indicating the average expression of target  
903 gene in that cluster. Expression data presented normalized using Variance Stabilizing  
904 Transformations for Single Cell UMI Data (SCTransform). (Relative to **Figure 1**)  
905

**A**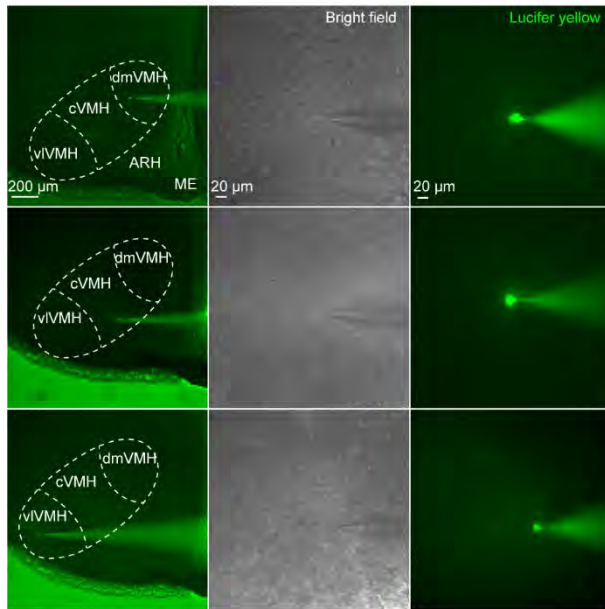**C**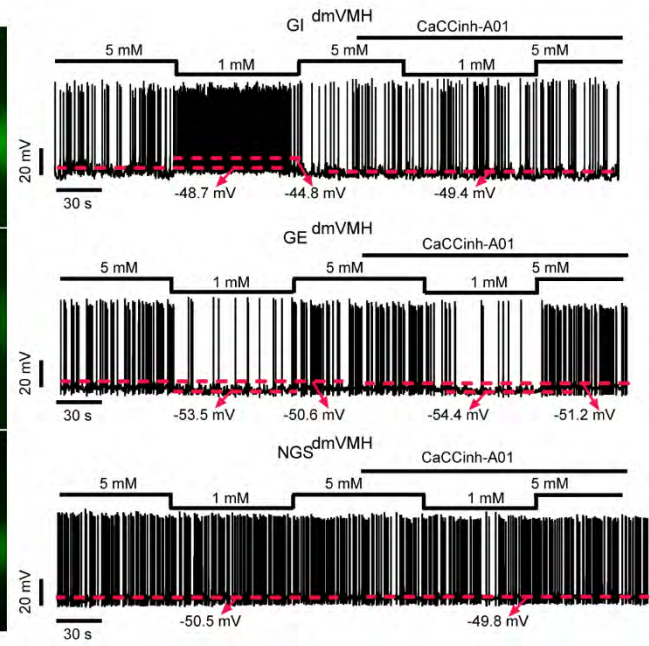**B**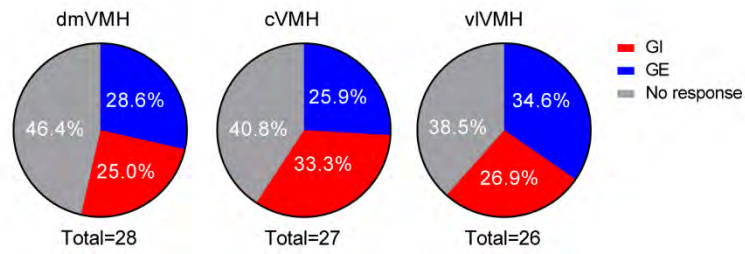

906

907 **Supplementary Figure 2. Electrical responses of VMH neurons to glucose fluctuation.**

908 **A.** Experimental illustration of neurons recorded randomly in the dmVMH, cVMH and vlVMH.

909 **B.** Percentage of GI, GE and NGS neurons in different VMH subdivisions (n=28 for dmVMH, n=27  
910 for cVMH, and n=26 for vlVMH).

911 **C.** Representative electrophysiological responses to glucose fluctuation (5 → 1 mM) in a GI, GE  
912 and NGS neuron in the absence or the presence of the Ano inhibitor CaCCinh-A01. (Relative to

913 **Figure 1)**

914

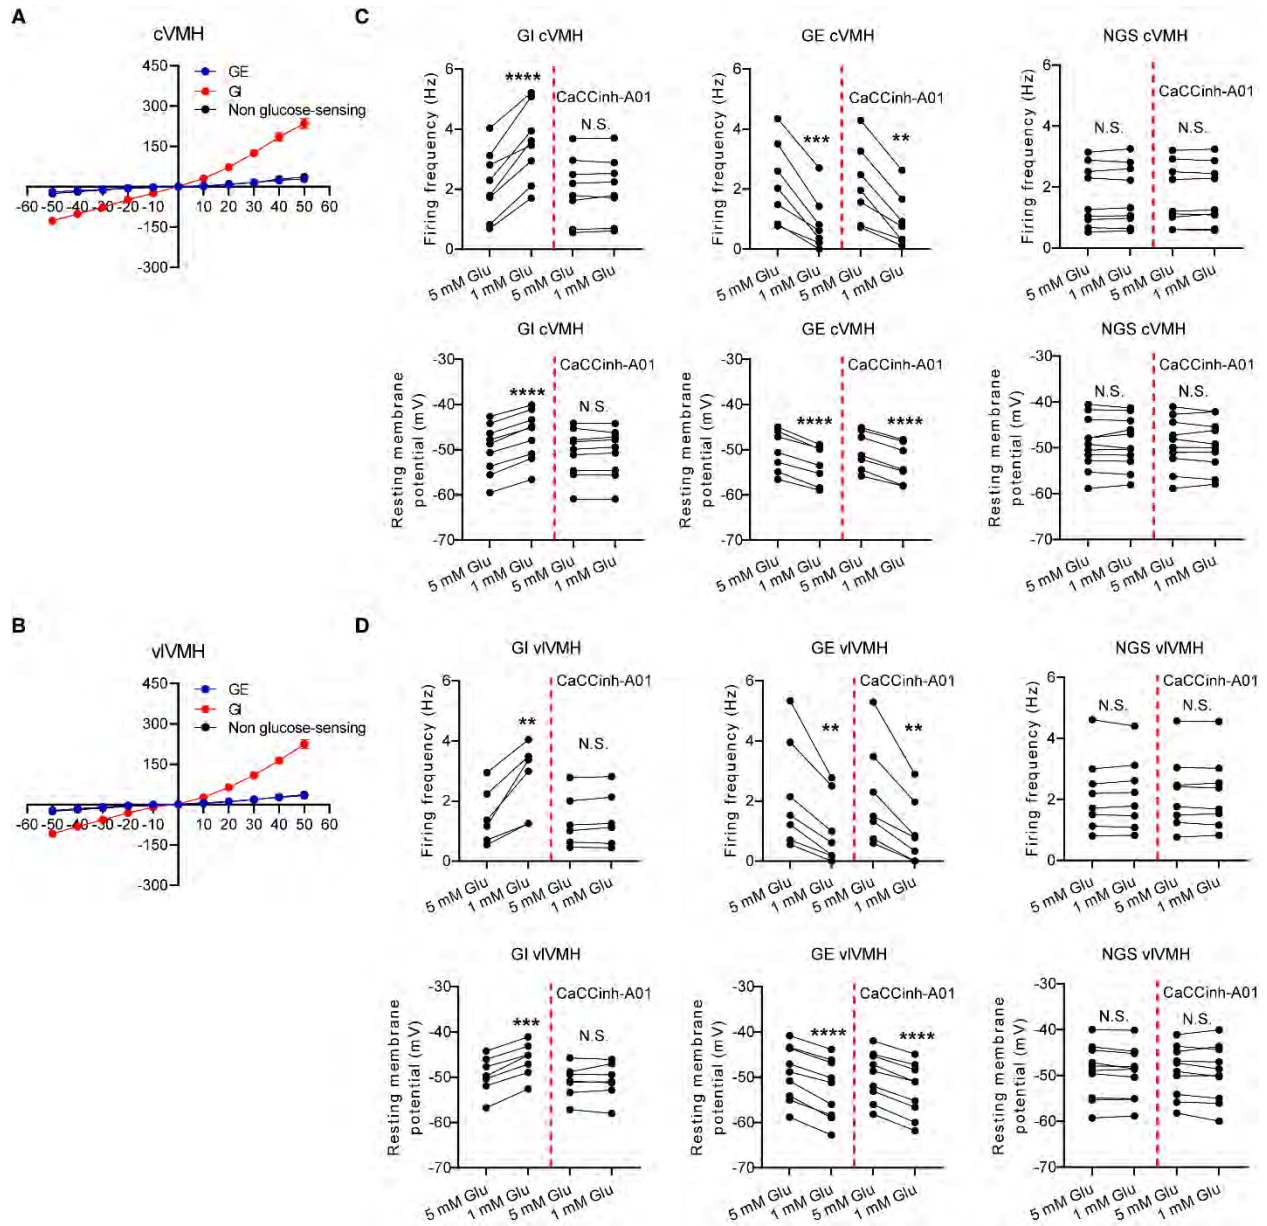

916 **Supplementary Figure 3. Ano4 mediates glucose sensing of cVMH and vVMH GI neurons**

917 **A-B.** Ano current was detected in GI neurons, but not in GE or NGS neurons in the cVMH (n=5  
918 for GE, n=5 for GI, and n=8 for NGS) and vVMH (n=7 for GE, n=7 for GI, and n=8 for NGS).

919 **C-D.** Firing frequency and resting membrane potential of GI, GE and NGS neurons in the cVMH  
920 and vVMH under glucose exposure from 5 → 1 mM in the absence or the presence of an Ano  
921 inhibitor CaCCinh-A01 (n=7 for GE, n=7 for GI, and n=8 for NGS in cVMH, and n=7 for GE, n=6  
922 for GI, and n=8 for NGS in vVMH). Data are expressed as mean ± standard errors of the mean.  
923 Significant differences between 5 mM glucose and 1 mM glucose are shown as \*\*p < 0.01, \*\*\*p  
924 < 0.001 and \*\*\*\*p < 0.0001 (Paired t-test for **C and D**). N.S. represents non-significant. (Relative  
925 to **Figure 1**)

926

927

928



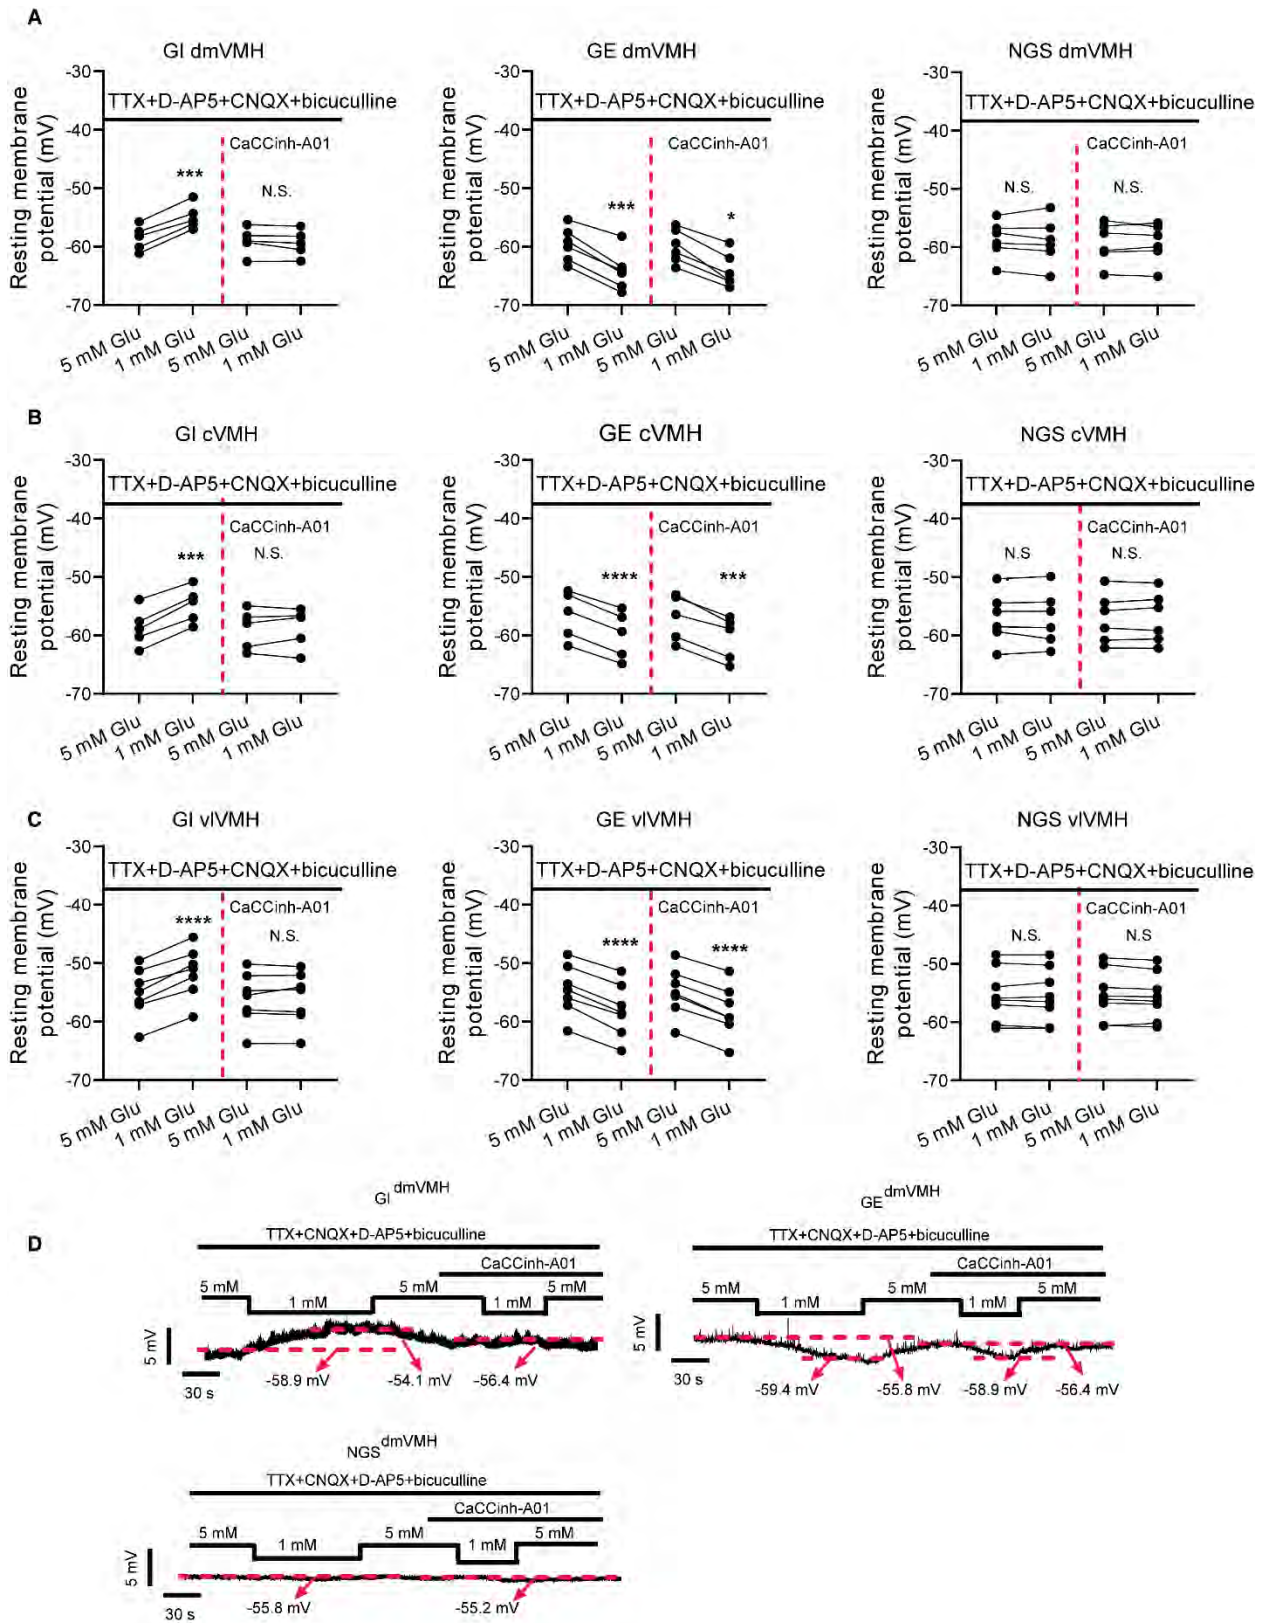

930 **Supplementary Figure 4. Electrical responses of VMH neurons to glucose fluctuation in**  
931 **the presence of a cocktail of synaptic blockers.**

932 **A-C.** Effect of the Ano inhibitor CaCCinh-A01 on membrane potential of GI, GE and NGS neurons  
933 in responses to glucose fluctuation in the presence of a cocktail of synaptic blockers (TTX, CNQX,  
934 D-AP5 and bicuculline) (n=5-6 for dmVMH, n=5-6 for cVMH, and n=7-8 for vVMH).

935 **D.** Representative membrane potential of a GI, GE and NGS neuron in dmVMH in response to  
936 glucose fluctuations (5 → 1 mM) in the presence of a cocktail of synaptic blockers (TTX, CNQX,  
937 D-AP5 and bicuculline).

938 Data are expressed as mean ± standard errors of the mean. Significant differences between 5  
939 mM glucose and 1 mM glucose are shown as \*p < 0.05, \*\*\*p < 0.001 and \*\*\*\*p < 0.0001 (paired  
940 t-test). N.S. represents non-significant. (Relative to **Figure 1**)

941

942



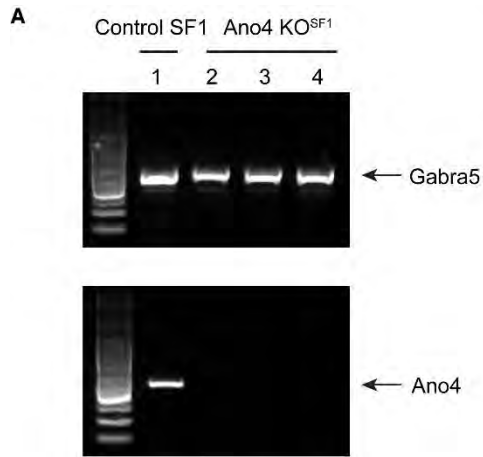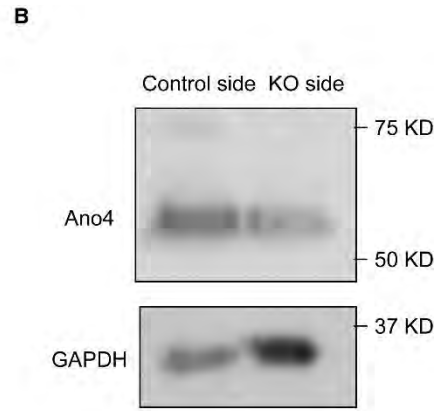

943

944 **Supplementary Figure 5. Validation of *Ano4* deletion in VMH<sup>SF1</sup> neurons.**

945 **A.** Representative image for the single neuron PCR to detect potential deletion of *Ano4*.  
946 TdTomato-labeled single SF-1 neuron (target) and non-tdTomato-labeled control neuron (non-  
947 target) were picked under the microscope. The CRISPR targeted *Ano4* locus was PCR amplified  
948 and PCR products were resolved by agarose gel electrophoresis. The irrelevant gene (*Gabra5*)  
949 was also amplified as a control for the integrity of genome samples.

950 **B.** *Ano4* protein level in control side of VMH and KO side of VMH. (Relative to **Figure 2**)

951

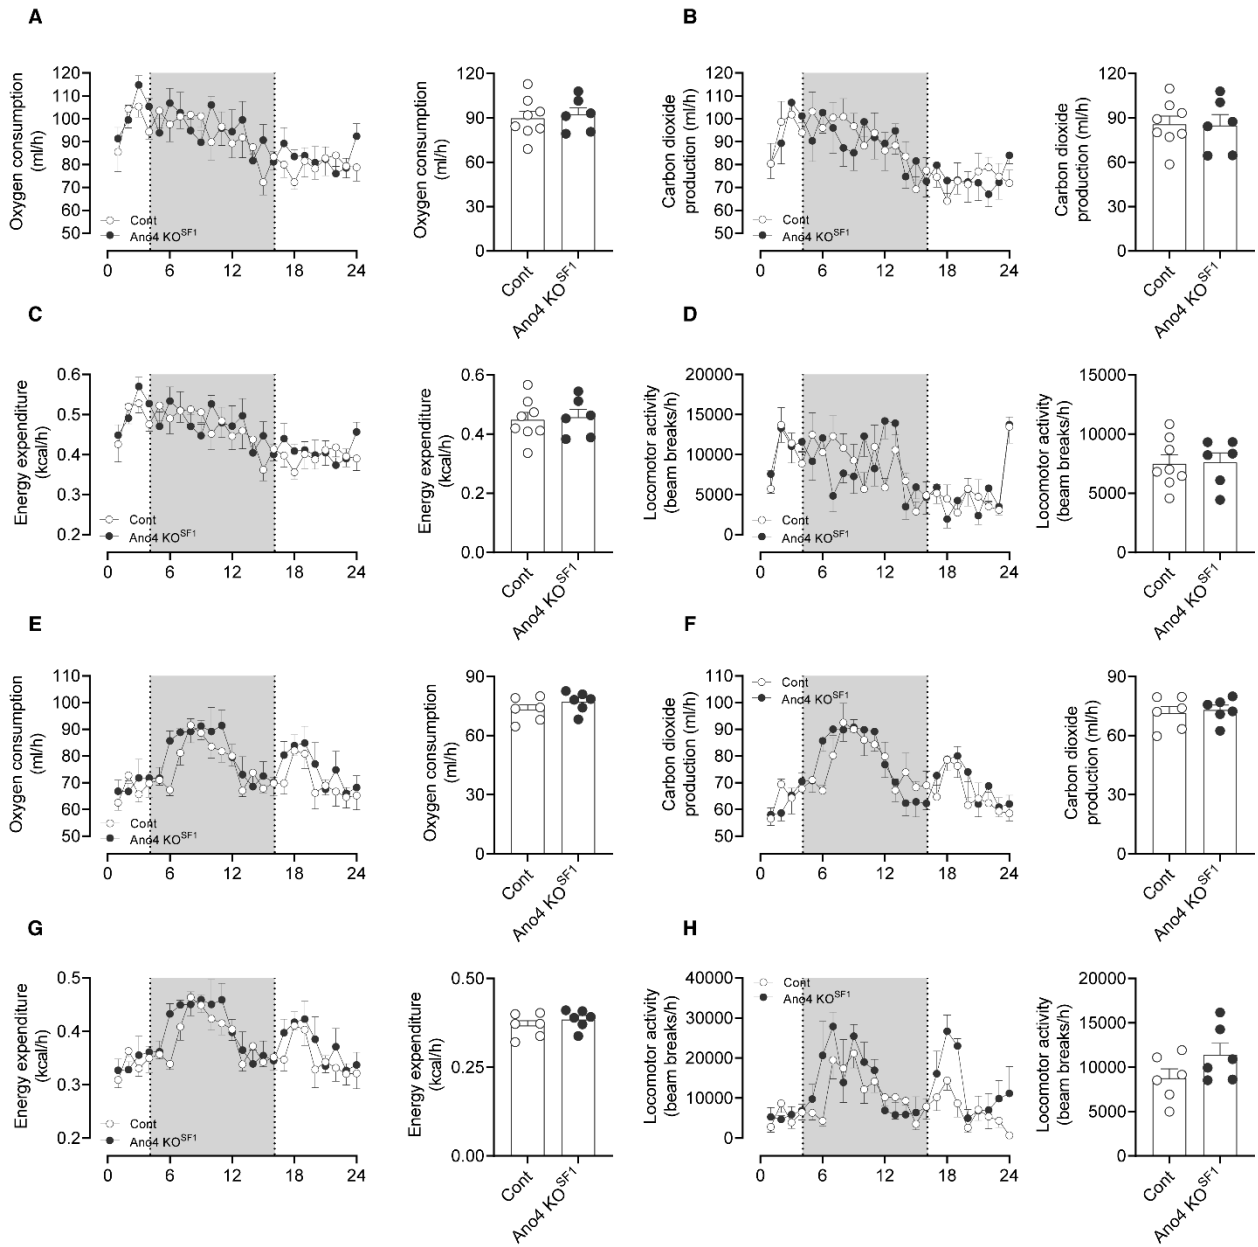

952

953 **Supplementary Figure 6. Knockout of *Ano4* in the VMH<sup>SF1</sup> neurons did not alter energy**  
954 **expenditure in both male and female mice.**

955 **A-D.** Oxygen consumption, carbon dioxide production, energy expenditure and locomotor activity  
956 in male mice (n=8 for Cont, and n=6 for *Ano4* KO<sup>SF1</sup>).

957 **E-H.** Oxygen consumption, carbon dioxide production, energy expenditure and locomotor activity  
958 in female mice (n=6 for Cont and *Ano4* KO<sup>SF1</sup>).

959 Data are expressed as mean  $\pm$  standard errors of the mean. There was no significant difference  
960 between Cont (Control) vs. *Ano4* KO<sup>SF1</sup> mice for all collected parameters. (Relative to **Figure 2**)

961

962

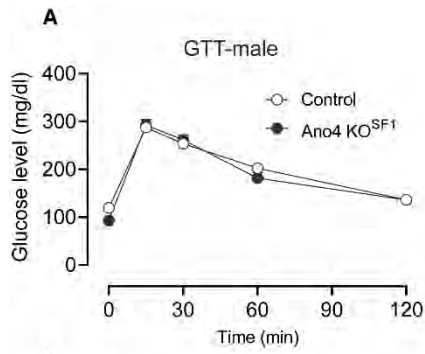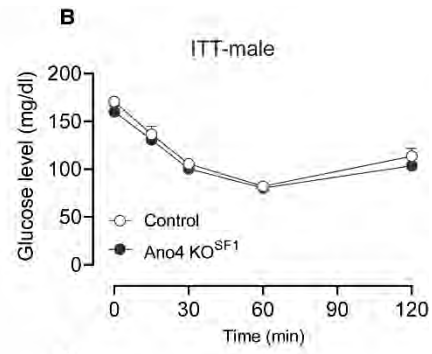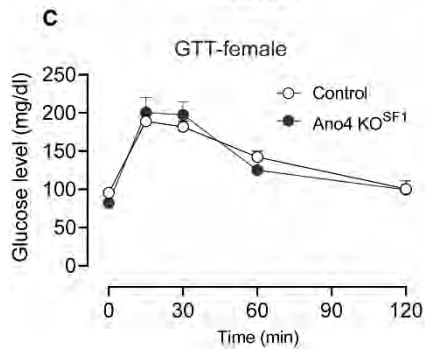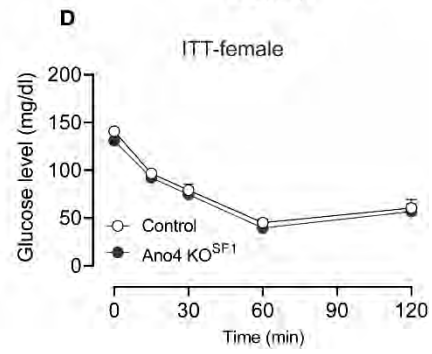

963

964 **Supplementary Figure 7. Effects of deleting *Ano4* in the VMH<sup>SF1</sup> neurons on GTT and ITT.**

965 **A-B.** Glucose tolerance and insulin sensitivity tests in male mice (n=10 for Control, and n=7 for  
966 *Ano4* KO<sup>SF1</sup>).

967 **C-D.** Glucose tolerance and insulin sensitivity tests in female mice (n=7 for Control, and n=6 for  
968 *Ano4* KO<sup>SF1</sup>).

969 Data are expressed as mean  $\pm$  standard errors of the mean. There was no significant difference  
970 between Control vs. *Ano4* KO<sup>SF1</sup> mice. (Relative to **Figure 2**)

971

972

**A**

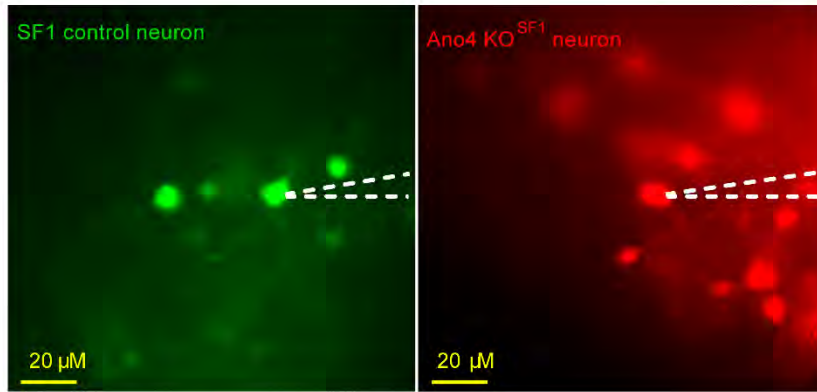

**B**

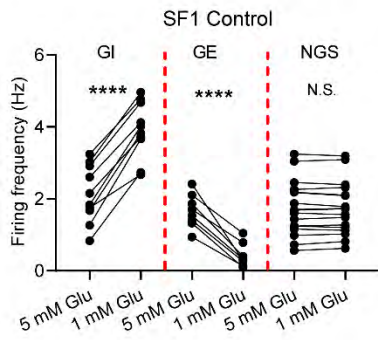

**C**

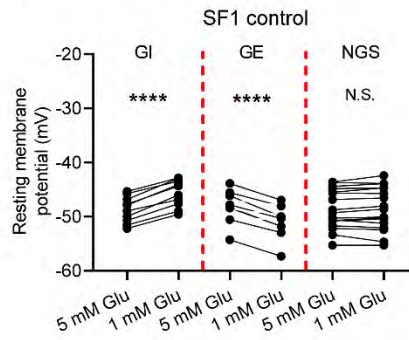

**D**

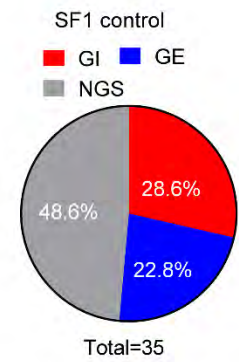

p=0.04, Chi square test

**E**

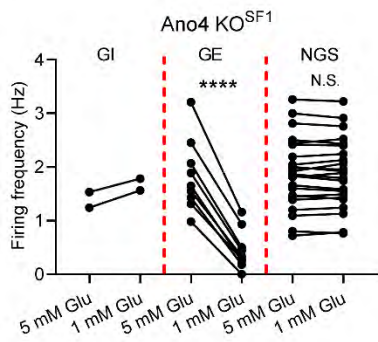

**F**

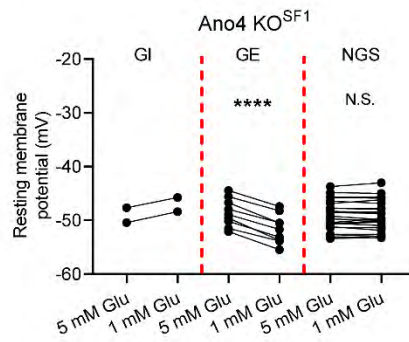

**G**

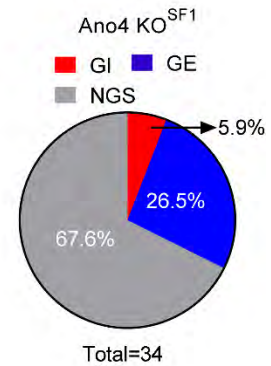

**H**

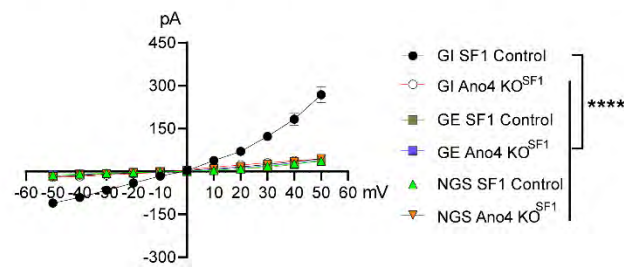



974 **Supplementary Figure 8. Knockout of *Ano4* in the VMH<sup>SF1</sup> neurons alters the composition**  
975 **of GI neurons.**

976 **A.** Experimental illustration of a recorded SF1 control neuron and *Ano4* KO<sup>SF1</sup> neuron.

977 **B-D.** Firing frequency, resting membrane potential and percentages of GI, GE and NGS neurons  
978 in SF1 control neurons under glucose exposure from 5 → 1 mM (n=8 for GE, n=10 for GI and  
979 n=17 for NGS).

980 **E-G.** Firing frequency, resting membrane potential and percentages of GI, GE and NGS neurons  
981 in *Ano4* KO<sup>SF1</sup> neurons under glucose exposure from 5 → 1 mM (n=8 for GE, n=2 for GI, and  
982 n=23 for NGS).

983 **H.** *Ano* current detected in GI SF1 control neurons, but not in other groups (n=6 for GI SF1 Control,  
984 and n=2 for GI *Ano4* KO<sup>SF1</sup>; n=4 for GE SF1 Control, and n=4 for GI *Ano4* KO<sup>SF1</sup>; and n=5 for GE  
985 SF1 Control, and n=5 for GI *Ano4* KO<sup>SF1</sup>).

986 Data are expressed as mean ± standard errors of the mean. Significant differences between 5  
987 mM glucose and 1 mM glucose are shown as \*\*\*\*p < 0.0001 (Paired t-test for **B, C, E** and **F**; Two-  
988 way ANOVA followed by Bonferroni tests for **H**). Chi square test was used to test significance  
989 between **D** and **G**. N.S. represents non-significant. (Relative to **Figure 2**)

990

991

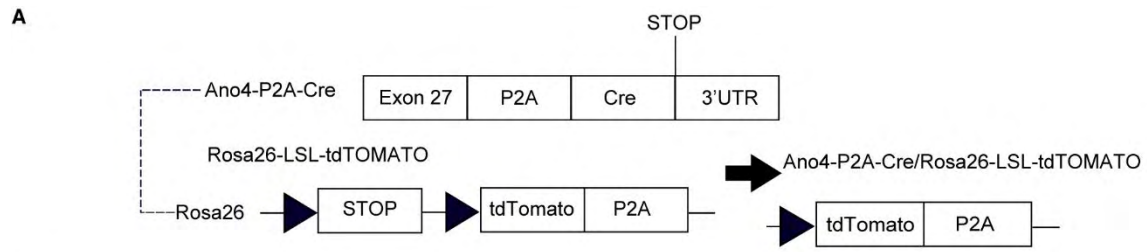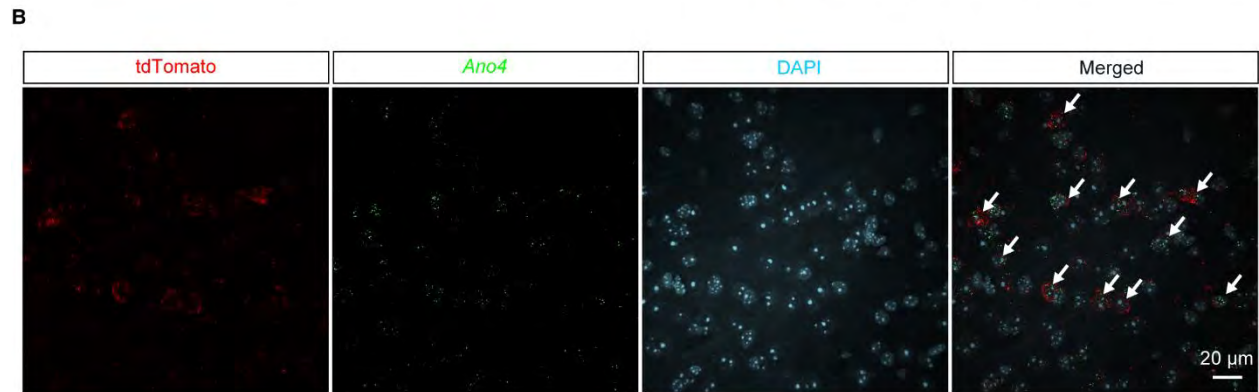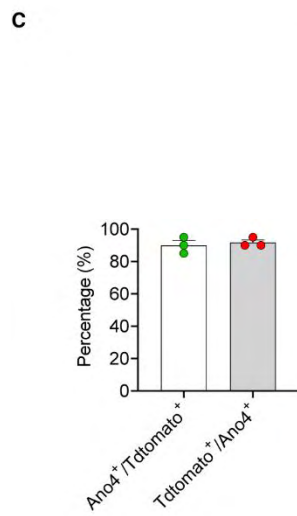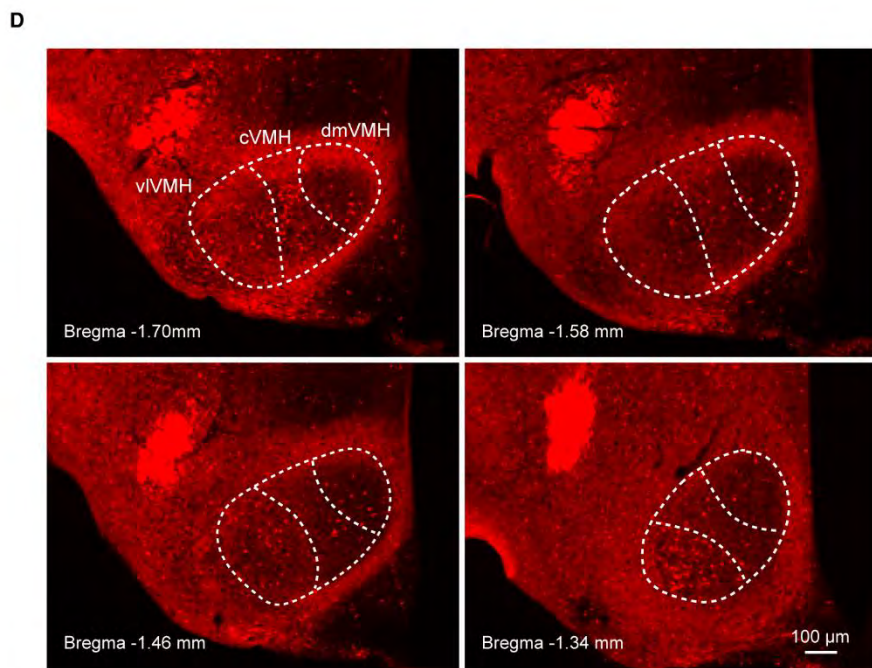

993 **Supplementary Figure 9. Visualization of *Ano4* neurons in the VMH.**

994 **A.** Strategy of breeding *Ano4*-P2A-Cre/Rosa26-LSL-tdTOMATO mouse line by crossing *Ano4*-  
995 P2A-Cre mouse line with Rosa26-LSL-tdTOMATO reporter mouse line.

996 **B-C.** Co-localization of *Ano4* mRNA with tdTomato mRNA in the VMH of *Ano4*-P2A-Cre/Rosa26-  
997 LSL-tdTOMATO mouse (n=3).

998 **D.** Distribution of *Ano4* neurons in the VMH of *Ano4*-P2A-Cre/Rosa26-LSL-tdTOMATO mouse.

999

1000

1001

**A**

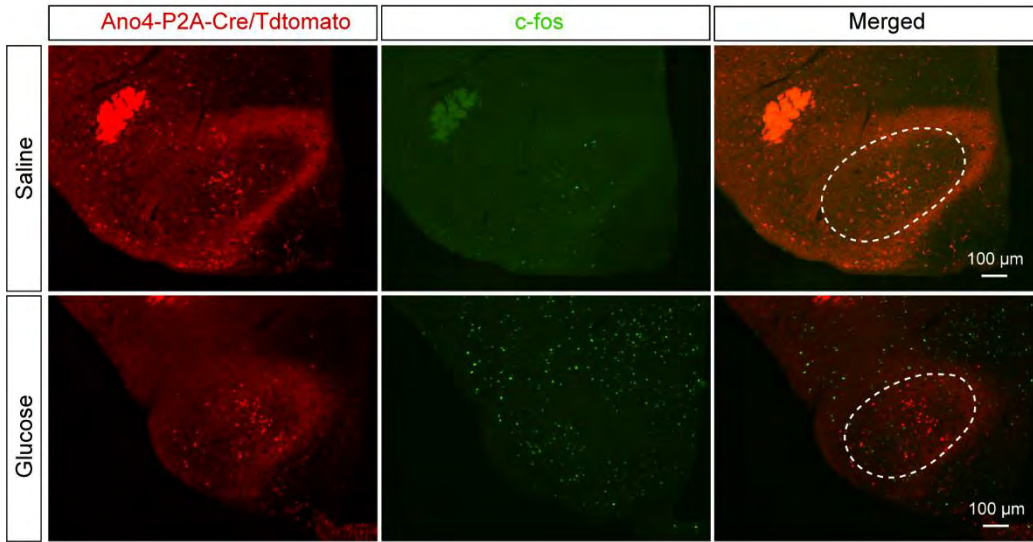

**B**

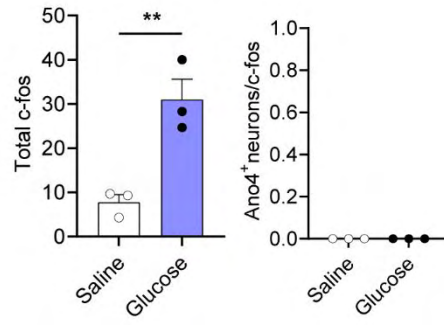

1002

1003 **Supplementary Figure 10. Glucose-induced c-fos in the VMH did not co-localize with**  
1004 **VMH<sup>Ano4</sup> neurons.**

1005 **A.** Representative images of c-fos staining and Ano4-expressing neurons in the VMH in Ano4-  
1006 P2A-Cre/Rosa26-LSL-tdTOMATO (male, 8-12 weeks of age) treated with saline (10 ml/kg, i.p.),  
1007 or glucose (2 g/kg, i.p.).

1008 **B.** Total c-fos positive cells and Ano4<sup>+</sup>/c-fos cells in the VMH induced by saline or glucose (n=3  
1009 for Saline and Glucose).

1010 Data are expressed as mean ± standard errors of the mean. Significant differences between  
1011 glucose and saline groups are shown as \*\*p < 0.01 (T-test for **B**).

1012

1013

**A**

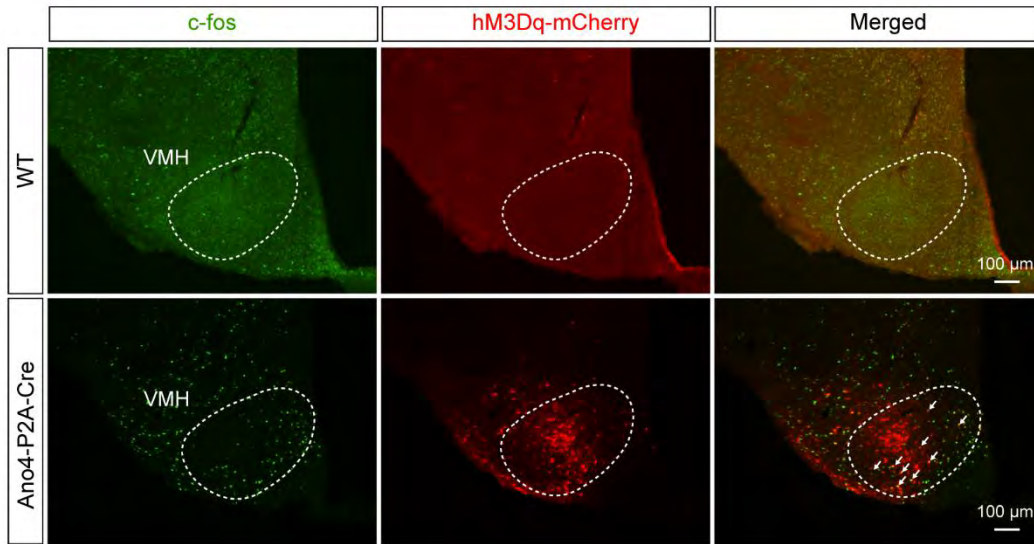

**B**

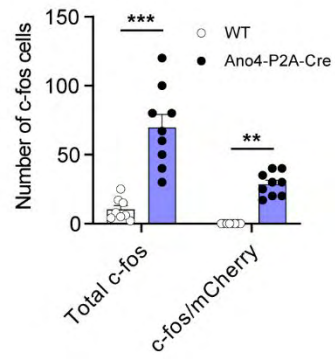

1014

1015 **Supplementary Figure 11. Validation of DREADD-mediated activation of VMH<sup>Ano4</sup> neurons.**

1016 **A.** Representative images of c-fos staining and hM3Dq-mCherry-expressing neurons in the VMH  
1017 in WT or Ano4-P2A-Cre (male, 12-16 weeks of age) treated with CNO (3 mg/kg, i.p.)

1018 **B-C.** Total c-fos positive cells and c-fos/mCherry cells in the VMH induced by CNO (n=8 for WT,  
1019 and n=9 for Ano4-P2A-Cre).

1020 Data are expressed as mean  $\pm$  standard errors of the mean. Significant differences between  
1021 glucose and saline groups are shown as \*\*p < 0.01, \*\*\*p < 0.001 (T-test for **B**). (Relative to **Figure**  
1022 **4**)

1023

1024



**A**

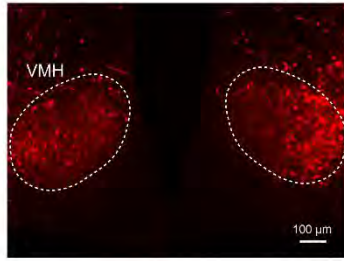

**B**

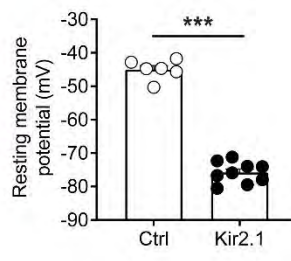

**C**

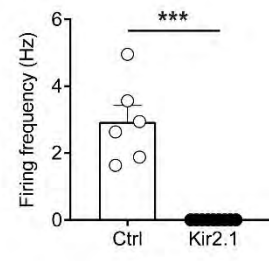

**D**

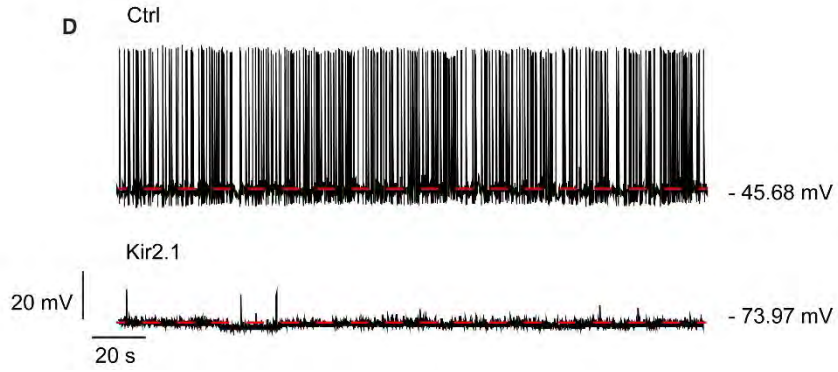

1025

1026 **Supplementary Figure 12. Validation of chronic inactivation of VMH<sup>Ano4</sup> neurons.**

1027 **A.** Representative immunofluorescence images of Kir2.1-P2A-dTOMATO in the VMH in Ano4-  
1028 P2A-Cre mice.

1029 **B-C.** Quantification of resting membrane potential and firing frequency of VMH<sup>Ano4</sup> neurons (n=6  
1030 for Ctrl, and n=9 for Kir2.1).

1031 **D.** Representative traces of action potential of a control VMH<sup>Ano4</sup> neuron and an inactivated  
1032 VMH<sup>Ano4</sup> neuron.

1033 Data are expressed as mean  $\pm$  standard errors of the mean. Significant differences between Ctrl  
1034 (control) and Kir2.1 are shown as \*\*\* $p < 0.001$  (T-test for **B** and **C**). (Relative to **Figure 4**).

1035

1036

1037

1038

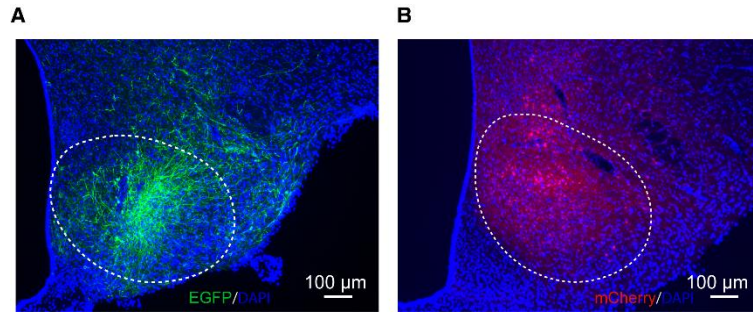

1039 **Supplementary Figure 13. Representative immunofluorescent images of hChR2**  
1040 **expression the VMH in Ano4-P2A-Cre mice.**

1041 **A.** VMH<sup>Ano4</sup> neurons (green color) infected by DIO-hChR2 (H134R)-EFYP with DAPI counter  
1042 staining.

1043 **B.** VMH<sup>non-Ano4</sup> neurons (red color) infected by DO-hChR2 (H134R)-mCherry with DAPI counter  
1044 staining. (Relative to **Figure 5** and **Figure 6**).

1045

1046

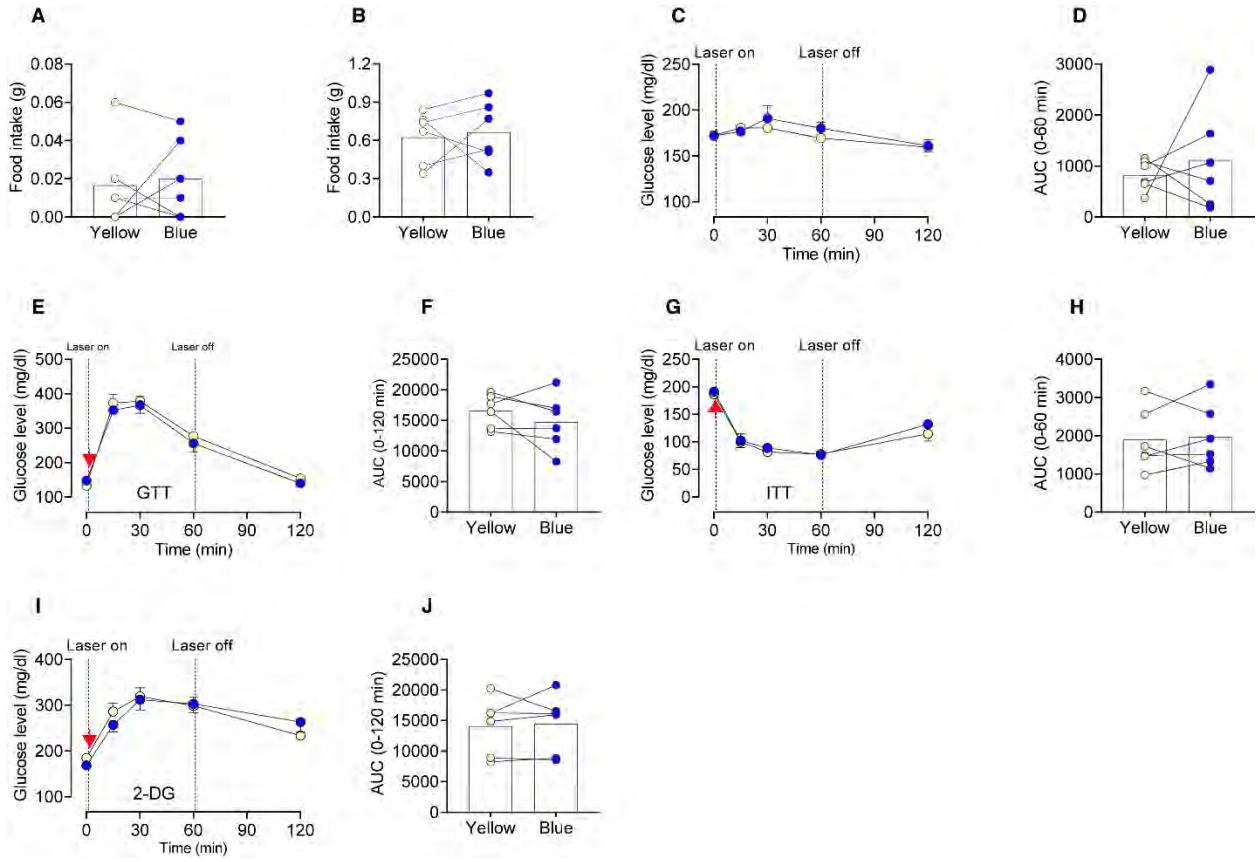

1047

1048 **Supplementary Figure 14. Blue light or yellow light did not affect food intake or blood**  
1049 **glucose levels in control mice.**

1050 **A-B.** Food intake in satiated and fasted condition (male, 8-12 weeks of age) (n=6).

1051 **C-F.** Blood glucose levels in a basal state (**C-D**), and in glucose tolerance test (**E-F**), insulin  
1052 sensitivity test (**G-H**) and 2-DG-induced glucopenia (**I-J**) (n=6).

1053 Data are expressed as mean  $\pm$  standard errors of the mean. There was no significant difference  
1054 between two groups. Red arrows indicate where glucose (**E**), insulin (**G**) or 2-DG (**I**) was injected.  
1055 (Relative to **Figure 5**)

1056

1057

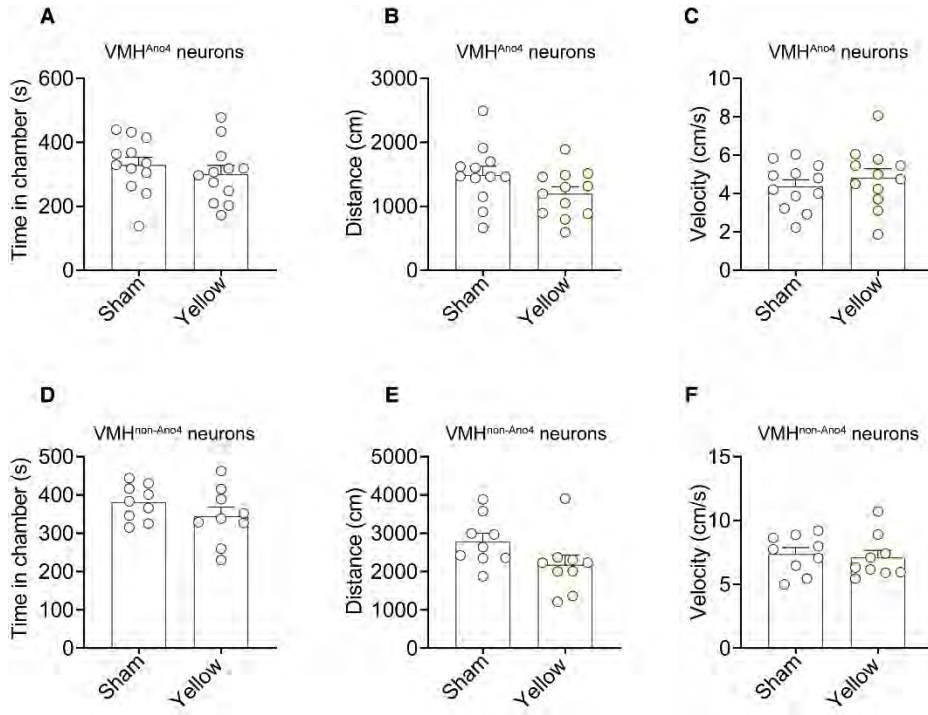

1058



1059 **Supplementary Figure 15. Yellow light stimulation of VMH<sup>Ano4</sup> and VMH<sup>non-Ano4</sup> neurons in**  
1060 **the VMH did not alter real-time place preference.**

1061 **A-C.** Time spent, distance travelled and velocity in each respective chamber for Ano4-P2A-Cre  
1062 mice (male, 8-12 weeks of age) with injection of AAV2-EF1a-DIO-hChR2 (H134R)-EFYP into the  
1063 VMH during yellow light stimulation (n=12).

1064 **D-F.** Time spent, and distance travelled and velocity in each respective chamber for Ano4-P2A-  
1065 Cre mice (male, 8-12 weeks of age) with injection of pAAV-EF1a-DO-hChR2 (H134R)-mCherry  
1066 into the VMH during yellow light stimulation (n=9).

1067 Data are expressed as mean  $\pm$  standard errors of the mean. There was no significant difference  
1068 between sham and yellow light stimulation. (Relative to **Figure 5** and **Figure 6**)

1069

1070

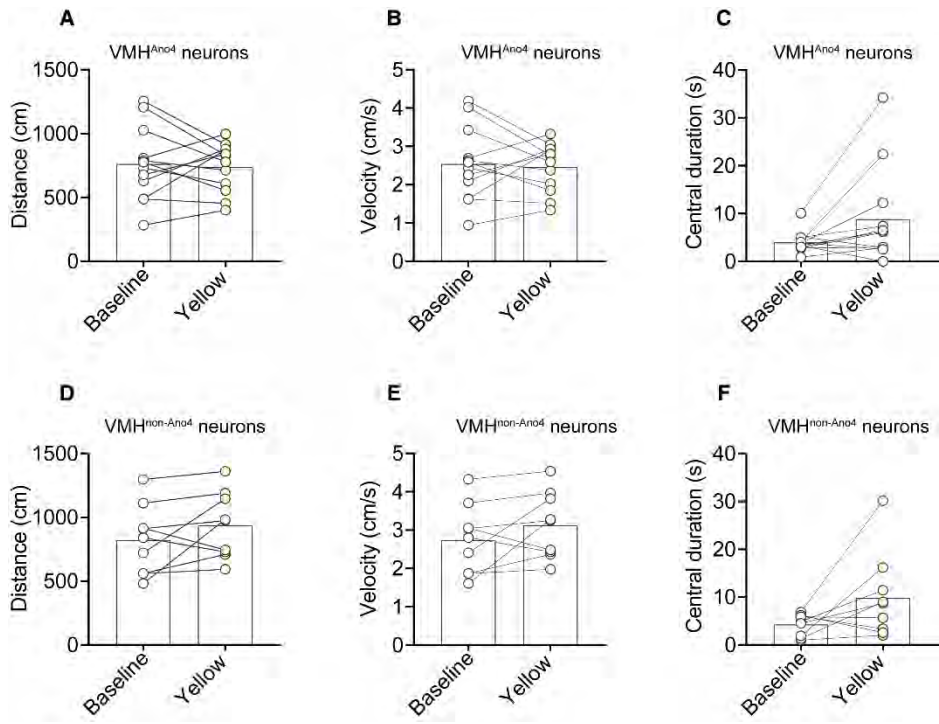

1071

1072 **Supplementary Figure 16. Yellow light stimulation of VMH<sup>Ano4</sup> and VMH<sup>non-Ano4</sup> neurons did**  
1073 **not alter locomotor activity.**

1074 **A-C.** Distance travelled, velocity and time spent in the center for Ano4-P2A-Cre mice with (male,  
1075 8-12 weeks of age) injection of AAV2-EF1a-DIO-hChR2 (H134R)-EFYP into the VMH during  
1076 yellow light stimulation (n=12).

1077 **D-F.** Distance travelled, velocity and time spent in the center for Ano4-P2A-Cre mice (male, 8-12  
1078 weeks of age) with injection of pAAV-EF1a-DO-hChR2 (H134R)-mCherry into the VMH during  
1079 yellow light stimulation (n=9).

1080 Data are expressed as mean  $\pm$  standard errors of the mean. There was no significant difference  
1081 between baseline and yellow light stimulation. (Relative to **Figure 5** and **Figure 6**)

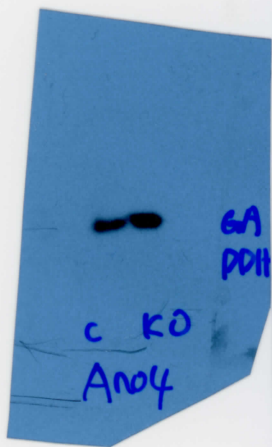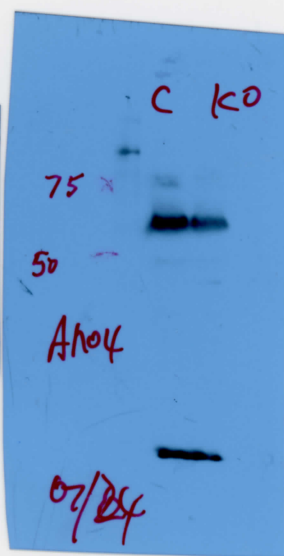

Supplement: jci-133-163391-s017.pdf [file jci-133-163391-s017.pdf]
